# Supplementary material for: PRD-2 directly regulates casein kinase I and counteracts nonsense-mediated decay in the Neurospora circadian clock
Source: eLife. 2020 Dec 9;9:e64007. doi: 10.7554/eLife.64007 (PMC7746235; doi:10.7554/eLife.64007)
Supplement: Supplementary file 1. [file elife-64007-supp1.docx]

**Supplementary File 1. *Neurospora crassa* strains used in this study.**

| **Strain** | **Genotype** | **Source** |
| --- | --- | --- |
| FGSC2489 | OR74A *mat* A | FGSC |
| FGSC9718 | ∆*mus-51*::barR; *mat* a | FGSC |
| FGSC11229 | ∆NCU04242::hphR; *mat* a | FGSC (*upf1prd-6*) |
| FGSC15706 | ∆NCU05267::hphR; ∆*mus-51*::barR; *mat* a | FGSC (*upf2*) |
| FGSC11679 | ∆NCU03435::hphR; *mat* a | FGSC (*upf3*) |
| FGSC12475 | ∆NCU03775::hphR; *mat* A | FGSC |
| FGSC22441 | ∆NCU04187::hphR; *mat* a (*mus-51*WT) | FGSC (*cbp80*) |
| 87-3 | *ras-1bd*; *mat* a | This Laboratory |
| 328-4 | *ras-1bd*; *mat* A | This Laboratory |
| 613-43 | *ras-1bd*; *prd-2*; *mat* a | Feldman Laboratory |
| 613-102 | *ras-1bd*; *prd-2*; *mat* A | Feldman Laboratory |
| 1138-1 | [barR::*qa-2*p-NCU00685]; ∆mus-52::hphR; *ras-1bd*; *mat* a [heterokaryon] | PMID: 19450520 |
| 1810 | *ras-1bd*; ∆NCU01019::barR; *mat* A | This Study (Fig 1, 3, 4) |
| 834-1 | *ras-1bd*; hphR::*qa-2*p-NCU01019 | This Study (Fig 1) |
| 1929 | *csr-1*::NCU01019-luciferase; *ras-1bd*; *prd-2INV*; *mat* A | This Study (Fig 1) |
| 1930 | *csr-1*::NCU01019-luciferase; *ras-1bd*; *mat* A | This Study (Sup Fig 2) |
| 1786-1 | *csr-1*::*frq*cboxp-luciferase::barR; *ras-1bd*; *mat* a | This Study (Fig 2, 4, 5) |
| 1931 | *csr-1*::*frq*cboxp-luciferase::barR; *ras-1bd*; ∆NCU01019::barR; *mat* A | This Study (Fig 2, 4, 5) |
| 1932 | *csr-1*::*frq*cboxp-luciferase::barR; *ras-1bd*; V5-NCU01019∆SUZ[∆aa345-431]::hphR | This Study (Fig 2) |
| 1933 | *csr-1*::*frq*cboxp-luciferase::barR; *ras-1bd*; V5-NCU01019∆Cterminus[∆aa440-790]::hphR | This Study (Fig 2) |
| 1934 | *csr-1*::*frq*cboxp-luciferase::barR; ∆*mus-51*::barR; NCU01019∆R3H[∆aa264-344]::hphR | This Study (Fig 2) |
| CX002_B4-11-1 | *csr-1*::NCU01019∆SUZ[∆aa345-432]-V5::barR; *ras-1bd*; ∆NCU01019::hphR | This Study (Fig 2) |
| CX002_B4-11-6 | *csr-1*::NCU01019∆R3H[∆aa281-344]-V5::barR; *ras-1bd*; ∆NCU01019::hphR | This Study (Fig 2) |
| CX002_B4-11-5 | *csr-1*::NCU01019∆Cterminus[∆aa495-790]-V5::barR; *ras-1bd*; ∆NCU01019::hphR | This Study (Fig 2) |
| CX002_B4-11-3 | *csr-1*::NCU01019∆Cterminus[∆aa525-612]-V5::barR; *ras-1bd*; ∆NCU01019::hphR | This Study (Fig 2) |
| CX002_B4-11-8 | *csr-1*::NCU01019∆Cterminus[∆aa625-682]-V5::barR; *ras-1bd*; ∆NCU01019::hphR | This Study (Fig 2) |
| 1813 | *ras-1bd*; NCU01019-10xGly_V5_10xHis_3xFLAG::hphR; *mat* a | This Study (Fig 2, 3) |
| 1888 | *ras-1bd*; NCU16560-10xGly_V5_10xHis_3xFLAG::hphR | This Study (Fig 3) |
| 1935 | barR::*qa-2*p-NCU00685; *ras-1bd* | This Study (Fig 4, 5) |
| 1936 | barR::*qa-2*p-NCU00685; *ras-1bd*; ∆NCU01019::barR | This Study (Fig 4) |
| 721-3 | NCU00685-SHORT-HA3::hphR; *ras-1bd*; *mat* a | This Study |
| 1937 | *csr-1*::*frq*cboxp-luciferase::barR; NCU00685-SHORT-HA3::hphR; *ras-1bd*; *mat* a | This Study (Fig 4) |
| 1938 | *csr-1*::*frq*cboxp-luciferase::barR; NCU00685-SHORT-HA3::hphR; *ras-1bd*; ∆NCU01019::barR | This Study (Fig 4) |
| 1939 | *csr-1*::*frq*cboxp-luciferase::barR; *ras-1bd*; ∆NCU04242::hphR; *mat* A | This Study (Fig 5) |
| 1940 | *csr-1*::*frq*cboxp-luciferase::barR; *ras-1bd*; ∆NCU01019::barR; ∆NCU04242::hphR | This Study (Fig 5) |
| 1941 | *csr-1*::*frq*cboxp-luciferase::barR; *ras-1bd*; ∆NCU05267::hphR | This Study (Fig 5) |
| 1942 | *csr-1*::*frq*cboxp-luciferase::barR; *ras-1bd*; ∆NCU05267::hphR; ∆NCU01019::barR | This Study (Fig 5) |
| 1943 | *csr-1*::*frq*cboxp-luciferase::barR; ∆NCU03435::hphR; *ras-1bd* | This Study (Fig 5) |
| 1944 | *csr-1*::*frq*cboxp-luciferase::barR; ∆NCU03435::hphR; *ras-1bd*; ∆NCU01019::barR | This Study (Fig 5) |
| 1945 | barR::*qa-2*p-NCU00685; *ras-1bd*; ∆NCU04242::hphR | This Study (Fig 5) |
